# Supplementary material for: Anthropogenic emission controls reduce summertime ozone–temperature sensitivity in the United States
Source: Copernicus journal article supplement (doi:10.5194/acp-25-2725-2025), 2025-03-03
Supplement: Supplementary file 1 [file acp-25-2725-2025-supplement.pdf]

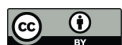

*Supplement of*

## **Anthropogenic emission controls reduce summertime ozone–temperature sensitivity in the United States**

**Shuai Li et al.**

*Correspondence to:* Xiao Lu ([luxiao25@mail.sysu.edu.cn](mailto:luxiao25@mail.sysu.edu.cn))

The copyright of individual parts of the supplement might differ from the article licence.

## **S1. Site selection**

We apply the following criteria to select sites with sufficient hourly ozone observations for the calculation of MDA8 ozone and long-term trend estimate:

- (1) Only days have at least 16 hourly observations per day are included;
- (2) Only summers (JJA) have at least 45 available daily MDA8 ozone records are included;
- (3) Only sites with valid ozone measurements for at least 24 years (i.e.  $\geq 75\%$ ) in the 1990-2021 period and for at least 3 years in 2017-2021 are selected.

A total of 608 sites, including 319 urban sites and 289 rural sites, are selected in this study.

**Table S1** Observed vs MERRA-2  $T_{\max}$  (daily maximum temperature) trend at summertime (June, July, August) (K per decade) from 1990 to 2021 in different regions.

|                    | OBS    | MERRA-2 |
|--------------------|--------|---------|
| CONUS              | 0.20   | 0.27*   |
| NEUS               | 0.01   | 0.10    |
| Midwest            | 0.68** | 0.58*   |
| SEUS               | 0.57   | 0.08    |
| Plains             | -0.09  | 0.23    |
| Intermountain West | 0.48** | 0.33    |
| NWUS               | 0.43   | 0.58    |
| SWUS               | 1.44** | 1.24**  |

\*\*represents p-value<0.01, \*represents p-value<0.05

**Table S2** The contribution for each mechanism

| <b>Term</b>                                                | <b>Calculation method</b>                                                                                                                                |
|------------------------------------------------------------|----------------------------------------------------------------------------------------------------------------------------------------------------------|
| All effect contribution                                    | the difference in $m_{\Delta O_3-\Delta T_{max}}$ between the BASE and 1995E simulation                                                                  |
| Temperature-indirect effect contribution                   | the difference of $m_{\Delta O_3-\Delta T_{max}}$ between BASE-FTEMP and 1995E-FTEMP                                                                     |
| Temperature-direct effect contribution                     | the difference of $m_{\Delta O_3-\Delta T_{max}}$ between BASE and 1995E minus the difference between BASE-FTEMP and 1995E-FTEMP                         |
| Transport contribution                                     | the difference of $m_{\Delta O_3-\Delta T_{max}}$ between BASE-TRANS and 1995E-TRANS                                                                     |
| Other-indirect effect contribution                         | difference of $m_{\Delta O_3-\Delta T_{max}}$ between BASE-FTEMP and 1995E-FTEMP minus the difference between BASE-TRANS and 1995E-TRANS                 |
| Combined contribution from four temperature-direct effects | the difference of $m_{\Delta O_3-\Delta T_{max}}$ between BASE and 1995E minus the difference between BASE-F4PATHS and 1995E-F4PATHS                     |
| BVOCs contribution                                         | the difference of $m_{\Delta O_3-\Delta T_{max}}$ between BASE and 1995E minus the difference between BASE-FBVOC and 1995E-FBVOC                         |
| Soil NO <sub>x</sub> contribution                          | the difference of $m_{\Delta O_3-\Delta T_{max}}$ between BASE and 1995E minus the difference between BASE-FSNO <sub>x</sub> and 1995E-FSNO <sub>x</sub> |
| PAN decomposition contribution                             | the difference of $m_{\Delta O_3-\Delta T_{max}}$ between BASE and 1995E minus the difference between BASE-FPAN and 1995E-FPAN                           |
| Dry deposition contribution                                | the difference of $m_{\Delta O_3-\Delta T_{max}}$ between BASE and 1995E minus the difference between BASE-FDEP and 1995E-FDEP                           |

**Table S3**  $m_{\Delta\text{O}_3-\Delta\text{Tmax}}$  (ppbv K<sup>-1</sup>) and  $r_{\Delta\text{O}_3-\Delta\text{Tmax}}$  in present-day (2017-2021) and  $m_{\Delta\text{O}_3-\Delta\text{Tmax}}$  trends (ppbv K<sup>-1</sup> per decade) from 1990 to 2021 in seven areas

|                                                                                   | NEUS      | SEUS      | Midwest   | Plains    | Intermountain<br>West | NWUS      | SWUS      |
|-----------------------------------------------------------------------------------|-----------|-----------|-----------|-----------|-----------------------|-----------|-----------|
| $m_{\Delta\text{O}_3-\Delta\text{Tmax}}$ (ppbv K <sup>-1</sup> )                  |           |           |           |           |                       |           |           |
| Mean                                                                              | 1.99±0.65 | 1.33±0.62 | 2.05±0.62 | 0.98±0.60 | 0.62±0.30             | 1.54±0.38 | 1.33±0.72 |
| Urban                                                                             | 2.20±0.58 | 1.43±0.66 | 2.20±0.56 | 1.06±0.63 | 0.76±0.22             | 1.67±0.22 | 1.48±0.78 |
| Rural                                                                             | 1.80±0.66 | 1.23±0.57 | 1.89±0.66 | 0.72±0.45 | 0.50±0.31             | 1.50±0.42 | 1.05±0.45 |
| $r_{\Delta\text{O}_3-\Delta\text{Tmax}}$                                          |           |           |           |           |                       |           |           |
| Mean                                                                              | 0.52±0.09 | 0.29±0.11 | 0.50±0.12 | 0.22±0.16 | 0.25±0.11             | 0.63±0.07 | 0.46±0.18 |
| Urban                                                                             | 0.56±0.06 | 0.30±0.12 | 0.52±0.10 | 0.21±0.13 | 0.29±0.07             | 0.65±0.08 | 0.48±0.19 |
| Rural                                                                             | 0.49±0.10 | 0.28±0.10 | 0.47±0.13 | 0.26±0.23 | 0.22±0.12             | 0.62±0.08 | 0.41±0.15 |
| $m_{\Delta\text{O}_3-\Delta\text{Tmax}}$ trends (ppbv K <sup>-1</sup> per decade) |           |           |           |           |                       |           |           |
| Mean                                                                              | -0.81**   | -0.62**   | -0.52**   | -0.31*    | -0.08                 | -0.30**   | -0.60**   |
| Urban                                                                             | -0.83**   | -0.68**   | -0.53**   | -0.37*    | -0.09*                | -0.35**   | -0.88**   |
| Rural                                                                             | -0.80**   | -0.57**   | -0.50**   | -0.18     | -0.06                 | -0.26**   | -0.34**   |

\*\*represents p-value<0.01, \*represents p-value<0.05(Only in  $m_{\Delta\text{O}_3-\Delta\text{Tmax}}$  trends)

**Table S4** Observed vs simulated  $m_{\Delta\text{O}_3-\Delta\text{T}_{\text{max}}}$  (ppbv K<sup>-1</sup>) and their correlation coefficients (r) in different periods and areas

| Period    | SIM       | OBS       | r    | SIM       | OBS                | r    |
|-----------|-----------|-----------|------|-----------|--------------------|------|
|           |           | CONUS     |      |           | NEUS               |      |
| 1995-1999 | 2.61±1.53 | 2.91±1.74 | 0.64 | 3.06±0.97 | 4.04±1.39          | 0.62 |
| 2001-2005 | 2.78±1.63 | 2.78±1.84 | 0.70 | 3.29±1.34 | 3.55±1.28          | 0.52 |
| 2007-2011 | 2.33±1.42 | 2.15±1.49 | 0.67 | 3.27±1.28 | 2.88±1.04          | 0.68 |
| 2013-2017 | 2.16±1.15 | 1.67±1.26 | 0.61 | 2.23±0.98 | 1.96±1.19          | 0.63 |
|           |           | SEUS      |      |           | Midwest            |      |
| 1995-1999 | 3.07±1.78 | 3.31±1.81 | 0.61 | 2.98±0.89 | 2.75±1.1           | 0.64 |
| 2001-2005 | 3.18±2.09 | 3.25±2.46 | 0.71 | 3.41±1.1  | 3.03±1.13          | 0.68 |
| 2007-2011 | 1.98±1.66 | 1.89±1.74 | 0.71 | 2.87±0.86 | 2.47±1.26          | 0.5  |
| 2013-2017 | 2.54±1.19 | 1.58±1.38 | 0.58 | 2.79±0.96 | 2.08±1.13          | 0.76 |
|           |           | Plains    |      |           | Intermountain West |      |
| 1995-1999 | 2.27±2.31 | 1.77±2.43 | 0.8  | 0.67±0.58 | 0.78±0.6           | 0.07 |
| 2001-2005 | 1.67±1.17 | 1.59±1.26 | 0.55 | 1.17±0.6  | 0.85±0.86          | 0.47 |
| 2007-2011 | 1.8±1.38  | 1.7±1.5   | 0.64 | 0.84±0.73 | 0.62±0.75          | 0.27 |
| 2013-2017 | 1.44±0.92 | 1.42±1.36 | 0.75 | 0.88±0.48 | 0.82±0.59          | 0.45 |
|           |           | NWUS      |      |           | SWUS               |      |
| 1995-1999 | 2.27±0.63 | 2.78±0.95 | 0.66 | 2.05±1.18 | 2.61±1.42          | 0.17 |
| 2001-2005 | 1.82±0.54 | 2.52±0.6  | 0.23 | 2.15±1.11 | 2.29±1.53          | 0.5  |
| 2007-2011 | 1.67±0.44 | 2.18±0.64 | 0.17 | 2.22±0.97 | 2.3±1.41           | 0.4  |
| 2013-2017 | 1.6±0.57  | 1.85±0.73 | 0.22 | 1.71±0.95 | 1.48±1.26          | 0.37 |

**Table S5** Observed vs Simulated ozone trend (ppbv per decade) from 1995 to 2017 in different regions.

|                    | OBS     | BASE    |
|--------------------|---------|---------|
| CONUS              | -6.50** | -6.10** |
| NEUS               | -9.15** | -6.76** |
| Midwest            | -6.82** | -6.77** |
| SEUS               | -8.39** | -8.43** |
| Plains             | -4.09*  | -5.95** |
| Intermountain West | -0.15   | -3.13 * |
| NWUS               | 0.5     | -1.69   |
| SWUS               | -4.56*  | -2.73   |

\*\*represents p-value<0.01, \*represents p-value<0.05

### Observed vs MERRA-2 $T_{\max}$ in different time

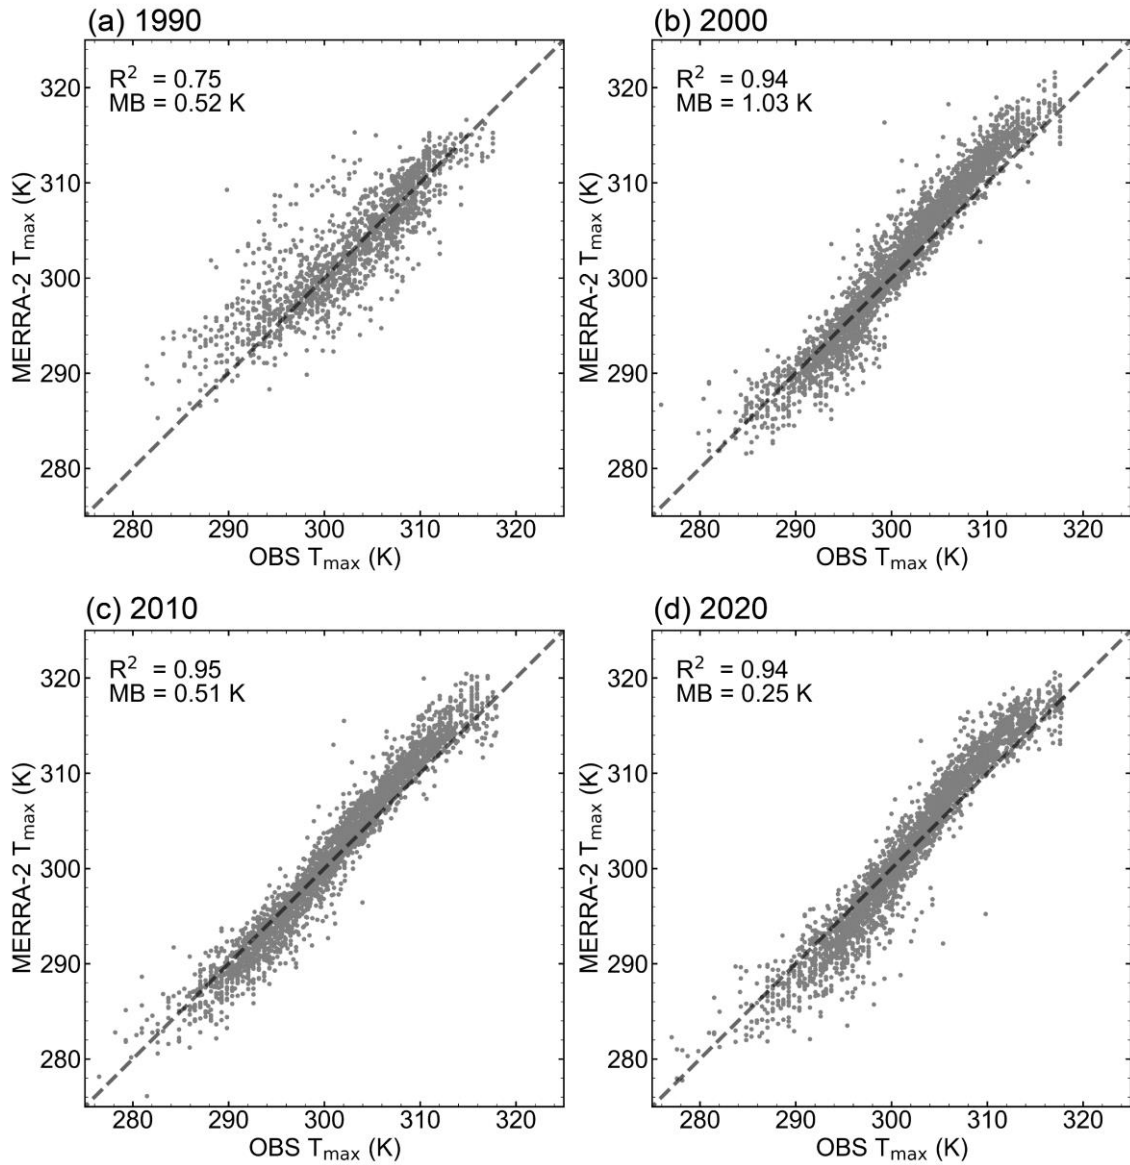

Figure S1. Observed (AQS) vs MERRA-2  $T_{\max}$  (daily maximum temperature) at summertime (June, July, August) in 1990(a),2000(b),2010(c) and 2020(d). The explained variance ( $R^2$ ) and mean bias (MB) are shown in the inset.



The impacts of different spin-up time for MDA8 ozone and  $m_{\Delta O_3-\Delta T_{max}}$

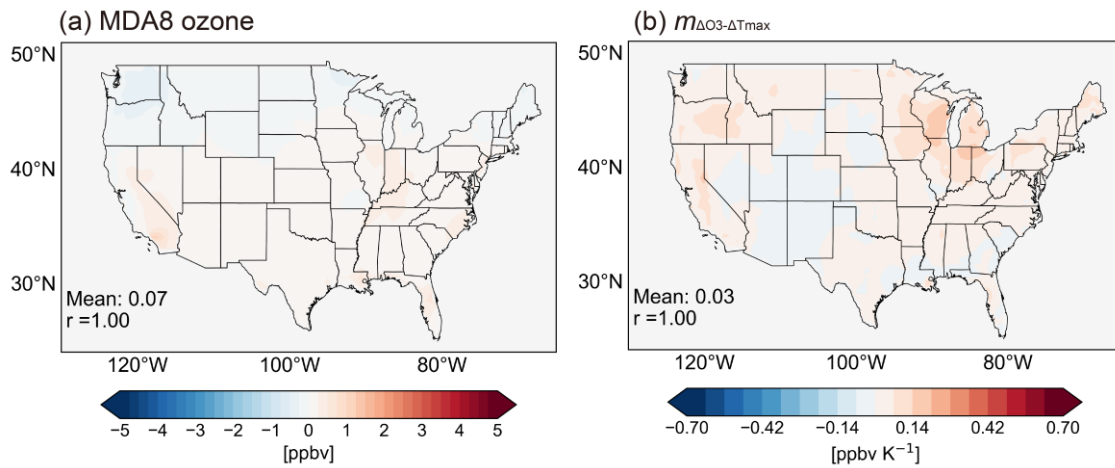

**Figure S2.** The impacts of different spin-up time for MDA8 ozone and  $m_{\Delta O_3-\Delta T_{max}}$ . The difference between BASE and Long spin-up time simulations in (a) MDA8 ozone and (b)  $m_{\Delta O_3-\Delta T_{max}}$ . The correlation coefficients ( $r$ ) between the simulations and mean values for the CONUS sites are shown inset.

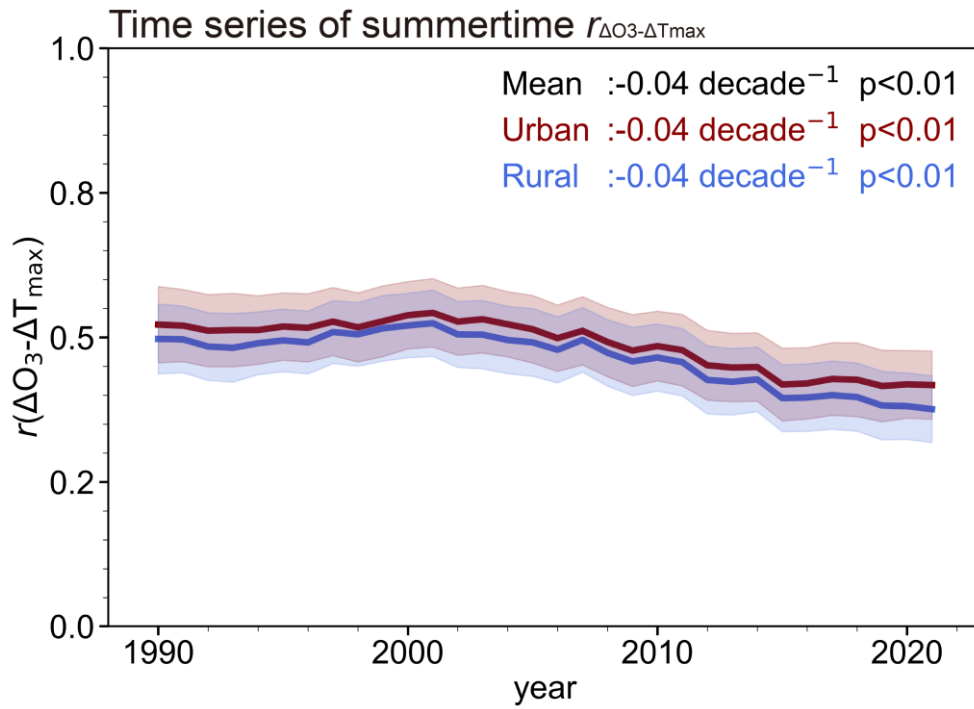

Figure S3. Same as Figure 3a but for  $r_{\Delta O_3-\Delta T_{max}}$ .

Time series of summertime  $m(\text{CO}_2-\Delta T_{\text{max}})$  in seven areas

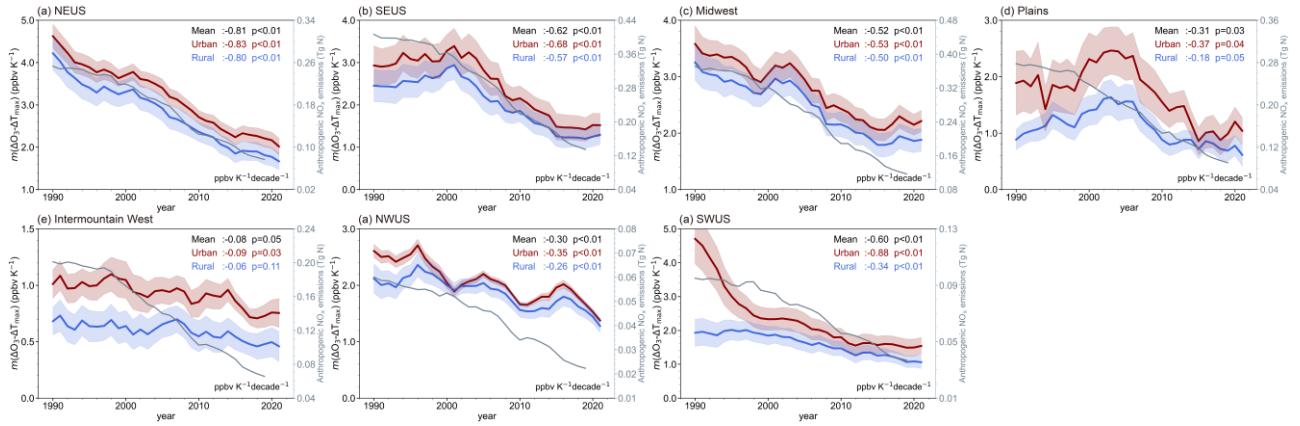

Figure S4. Same as Figure 3a but in seven areas.

Time series of summertime  $r_{\Delta O_3-\Delta T_{max}}$  in seven areas

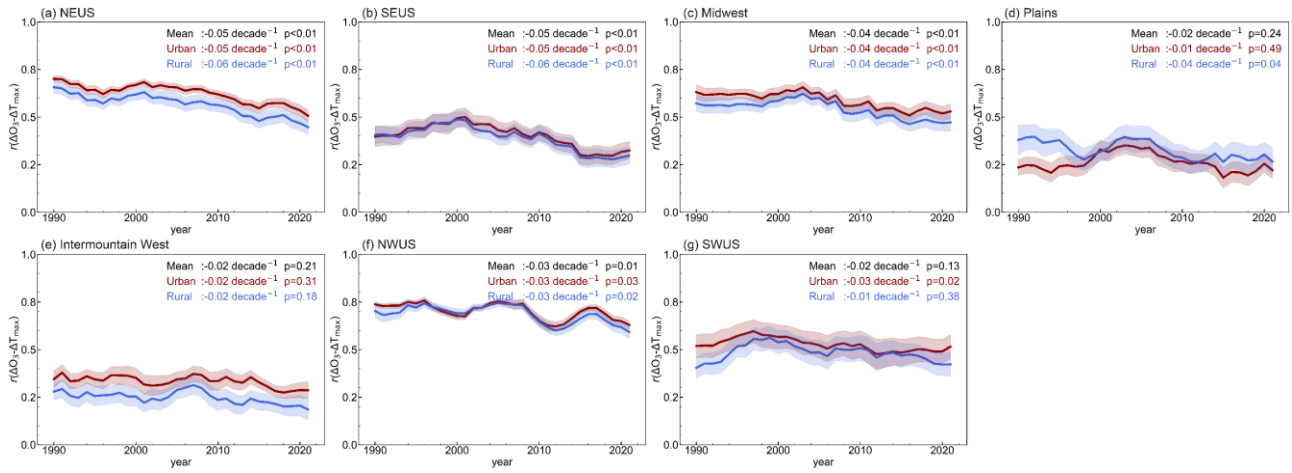

Figure S5. Same as Figure S4 but for  $r_{\Delta O_3-\Delta T_{max}}$ .

Comparison of observed and simulated MDA8 ozone, 1995-2017

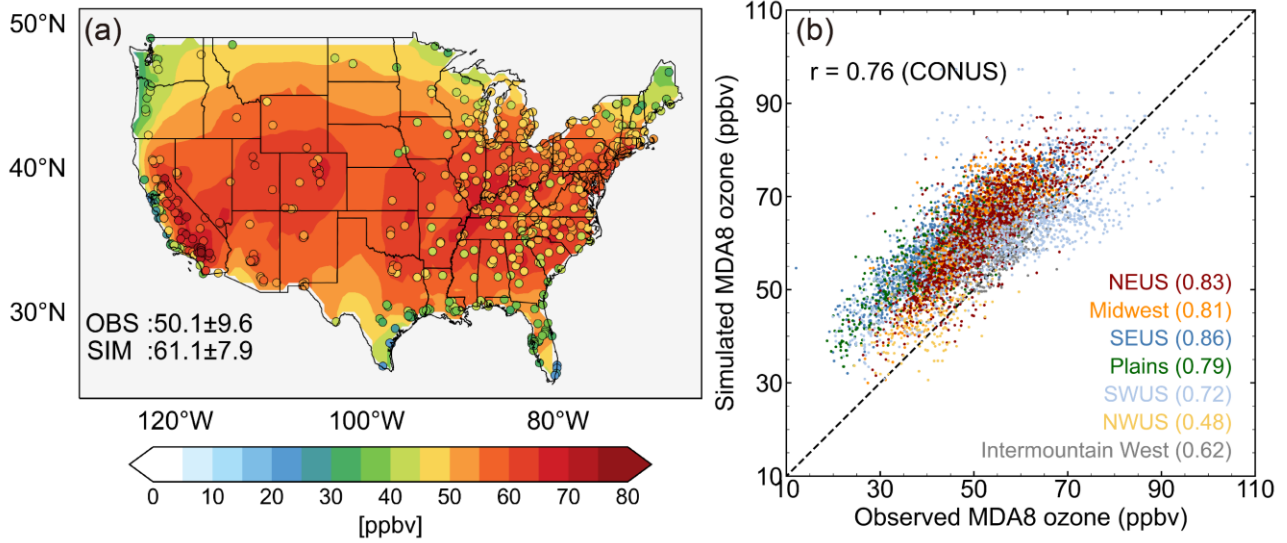

Figure S6. Same as Figure 4 but for MDA8 ozone.

$r_{\Delta O_3-\Delta T_{max}}$  trends in different emission scenarios

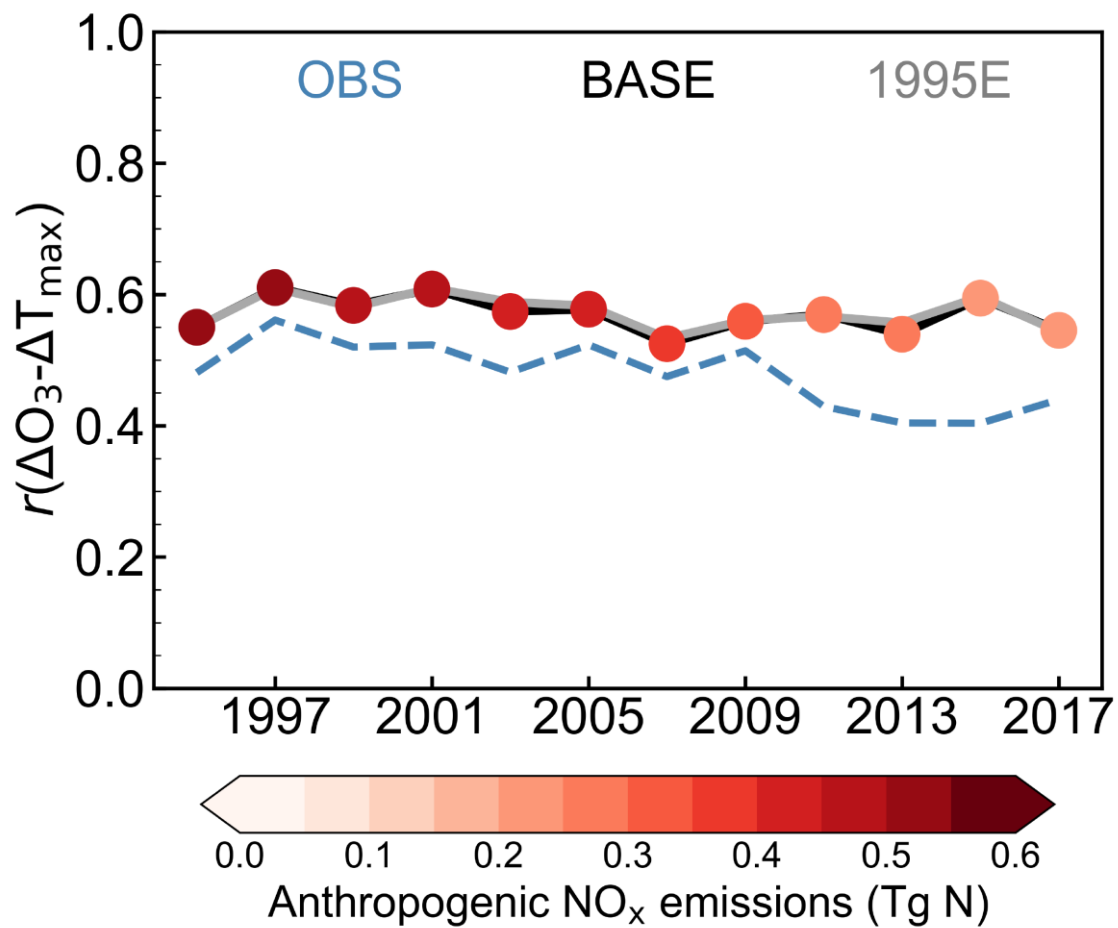

Figure S7. Same as Figure 5b but for  $r_{\Delta O_3-\Delta T_{max}}$ .

$m_{\Delta O_3-\Delta T_{max}}$  trends in different emission scenarios in seven areas

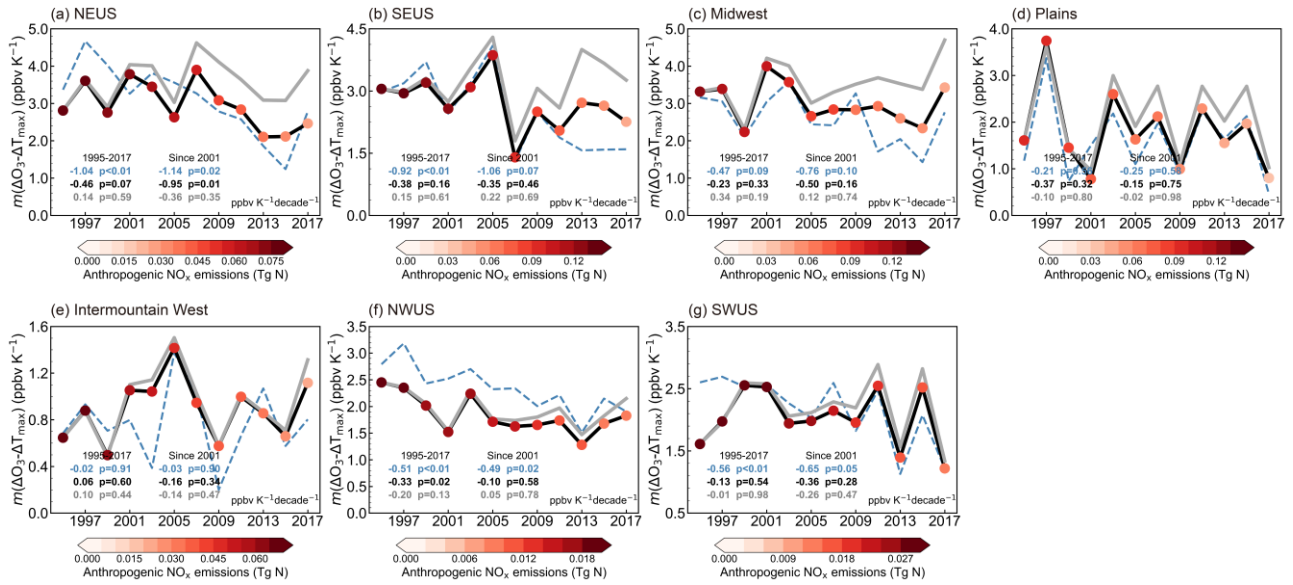

Figure S8. Same as Figure 5b but in seven areas.

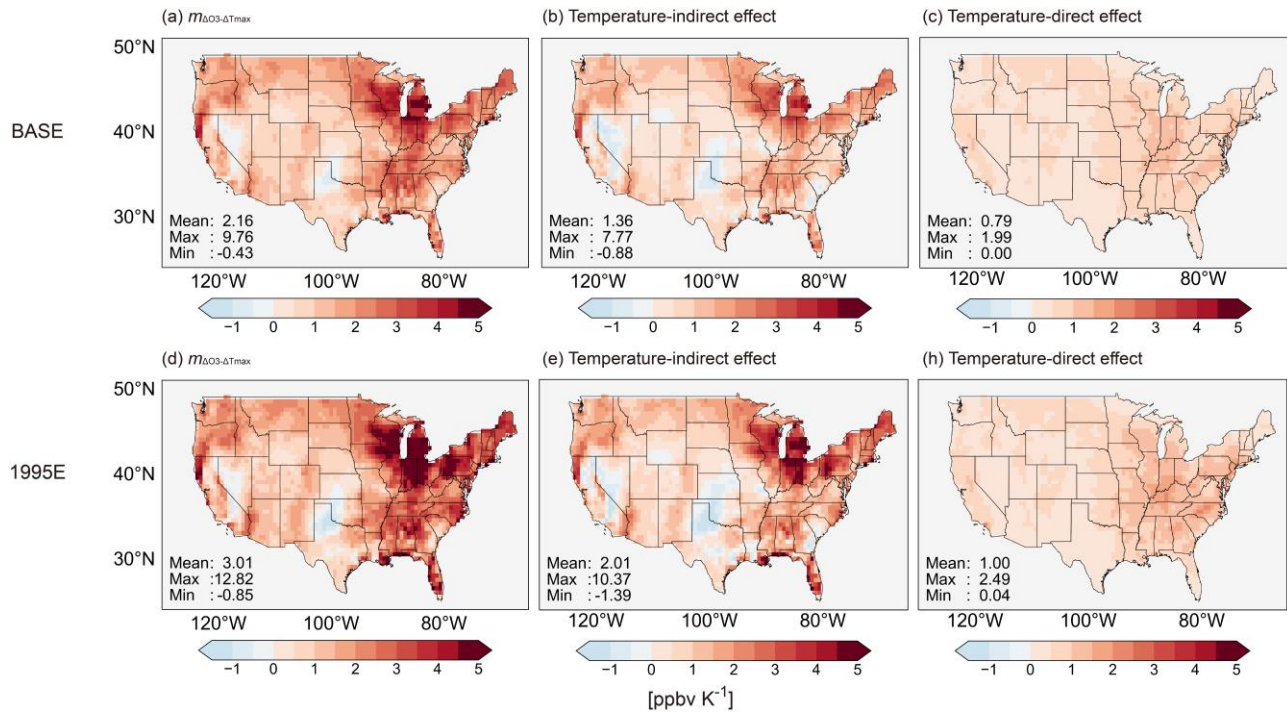

**Figure S9. Contribution of the temperature-indirect and temperature-direct effects for  $m_{\Delta O_3-\Delta T_{max}}$  in different emission scenarios. (a) the  $m_{\Delta O_3-\Delta T_{max}}$  in the BASE. (d) the  $m_{\Delta O_3-\Delta T_{max}}$  in the 1995E. (b) The contribution of the temperature-indirect effect to  $m_{\Delta O_3-\Delta T_{max}}$  in the BASE-FTEMP. (e) is the same as (b), but in the 1995E-FTEMP. (c) The contribution of the temperature-direct effect to  $m_{\Delta O_3-\Delta T_{max}}$ , estimated as the difference of  $m_{\Delta O_3-\Delta T_{max}}$  between BASE and BASE-FTEMP. (h) is the same as (c), but with anthropogenic NO<sub>x</sub> emission level fixed at 1995 level (*i.e.* estimated as the difference between 1995E and 1995E - FTEMP). Mean, maximum, and minimum values of the contributions among all CONUS sites are shown inset.**



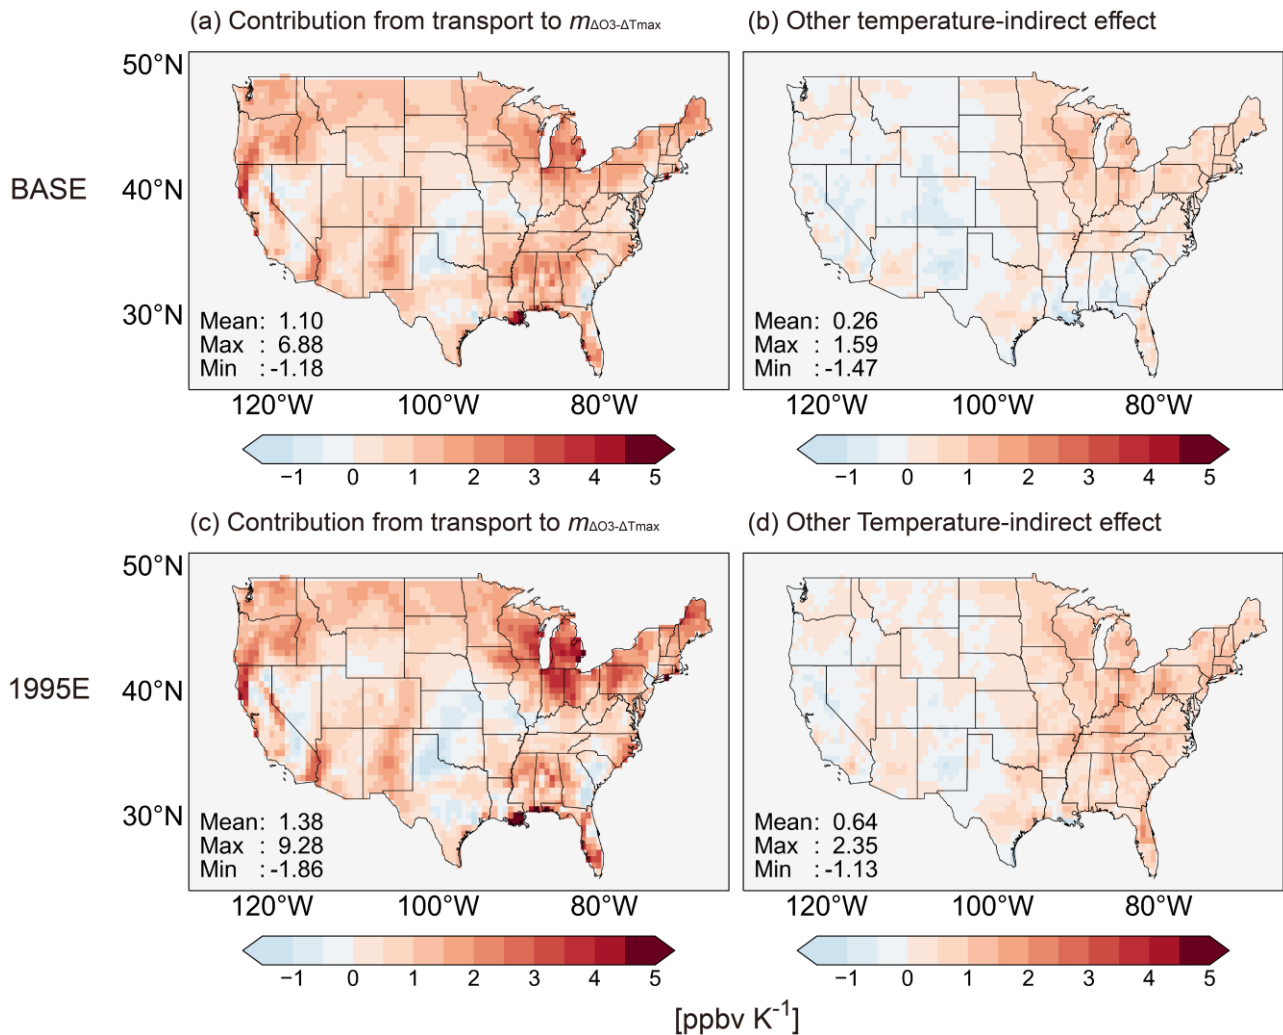

**Figure S10.** Contribution of the different temperature-indirect effects for  $m_{\Delta O_3-\Delta T_{max}}$  in different emission scenarios. (a) The contribution of the transport effect to  $m_{\Delta O_3-\Delta T_{max}}$  in the BASE-TRANS. (c) is the same as (a), but in the 1995E-TRANS. (b) The contribution of the other temperature-indirect effect to  $m_{\Delta O_3-\Delta T_{max}}$ , estimated as the difference of  $m_{\Delta O_3-\Delta T_{max}}$  between BASE-FTEMP and BASE-TRANS. (d) is the same as (b), but with anthropogenic NO<sub>x</sub> emission level fixed at 1995 level (*i.e.* estimated as the difference between 1995E-FTEMP and 1995E-TRANS). Mean, maximum, and minimum values of the contributions among all CONUS sites are shown inset.

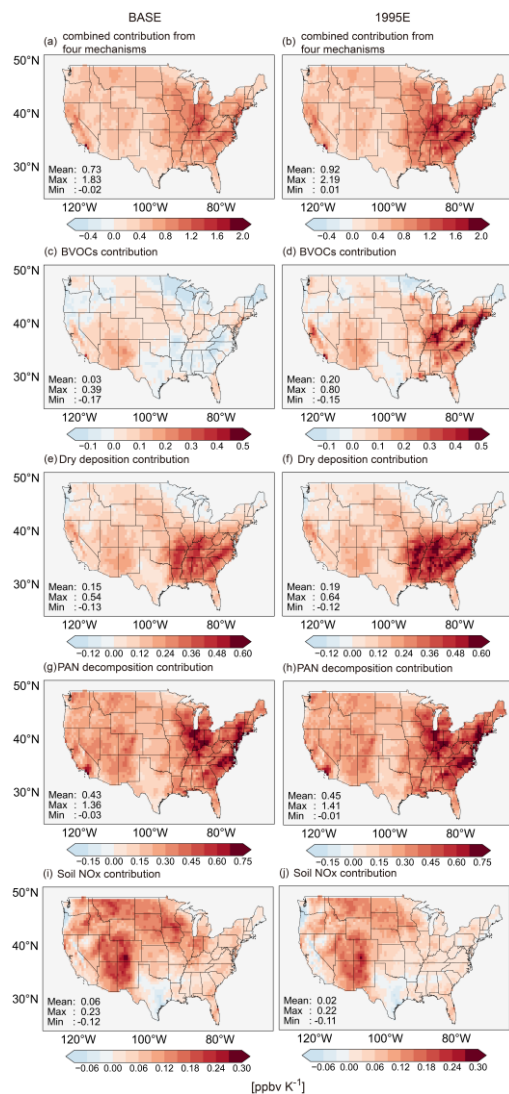

**Figure S11. Contribution of the different temperature-direct effects for  $m_{\Delta O_3-\Delta T_{max}}$  in different emission scenarios. (a) Combined contribution of the four temperature-dependent mechanisms (BVOCs emissions, dry deposition, PAN decomposition, and soil NOx emissions) to  $m_{\Delta O_3-\Delta T_{max}}$ , estimated as the difference of  $m_{\Delta O_3-\Delta T_{max}}$  between BASE and BASE-F4PATHS. (b) is the same as (a), but with anthropogenic NOx emission level fixed at 1995 level (*i.e.* estimated as the difference between 1995E and 1995E -F4PATHS). (c-i, d-j) Individual contribution of BVOCs emissions, dry deposition, PAN decomposition, and soil NOx emissions) to  $m_{\Delta O_3-\Delta T_{max}}$  with 2017 and 1995 emission level, respectively. Mean, maximum, and minimum values of the contributions among all CONUS sites are shown inset. Note that the value range of each figure is different.**

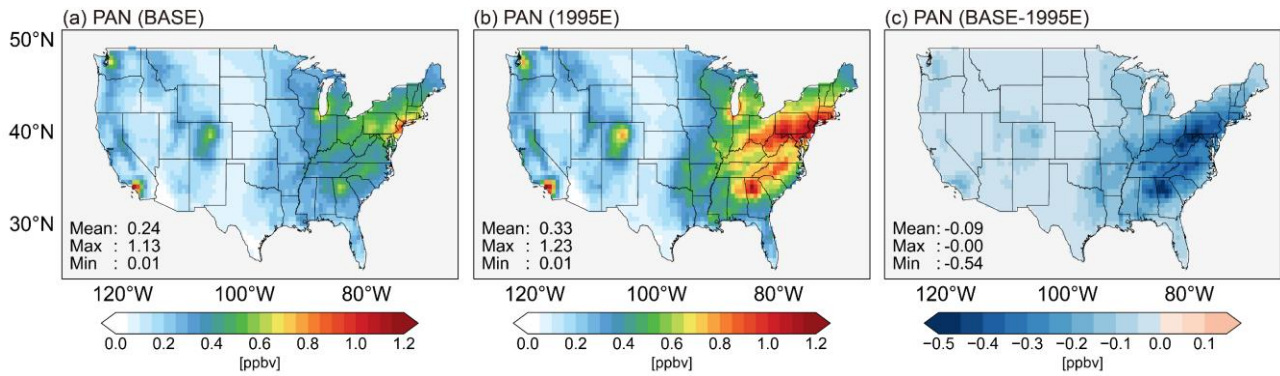

**Figure S12.** The distribution of mean PAN concentration in July 2017 from the BASE(a) and 1995E(b) simulation. (c) the difference for PAN concentration between BASE and 1995E. Mean, maximum, and minimum values in the CONUS are shown inset.

July Ozone- $T_{max}$  relationship in seven areas

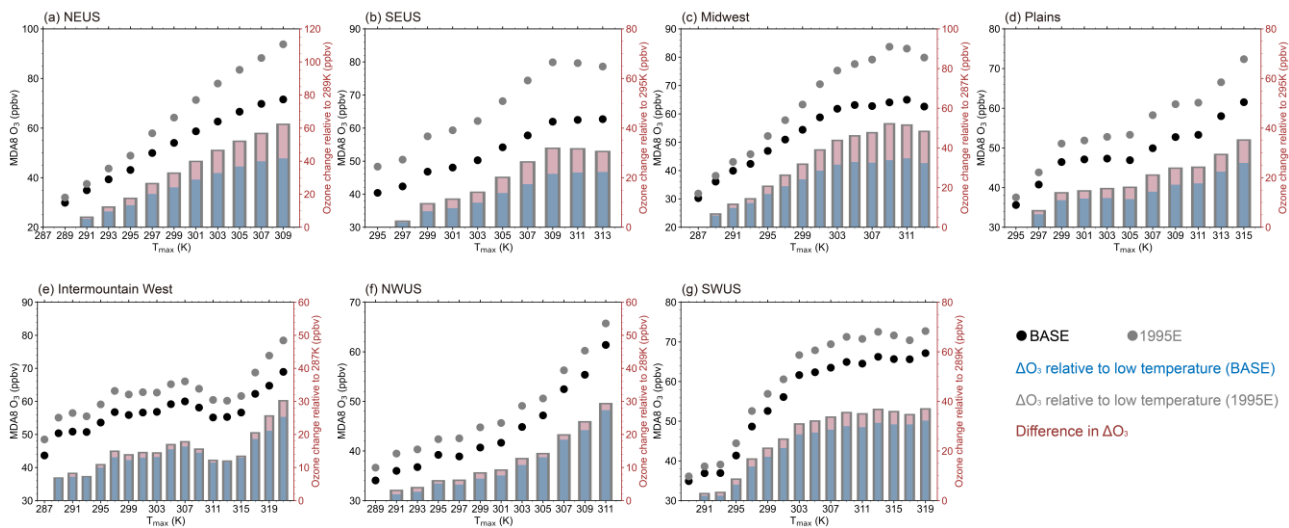

Figure S13. Same as Figure 9a but in seven areas. Note that the value range of each figure is different.
